# Supplementary material
Source: Springer Nature journal article supplement (https://www.springermedizin.de/resource/supplementary/13012_2013_737_MOESM3_ESM.pdf/9630570)

■ Patients ■ Professionals

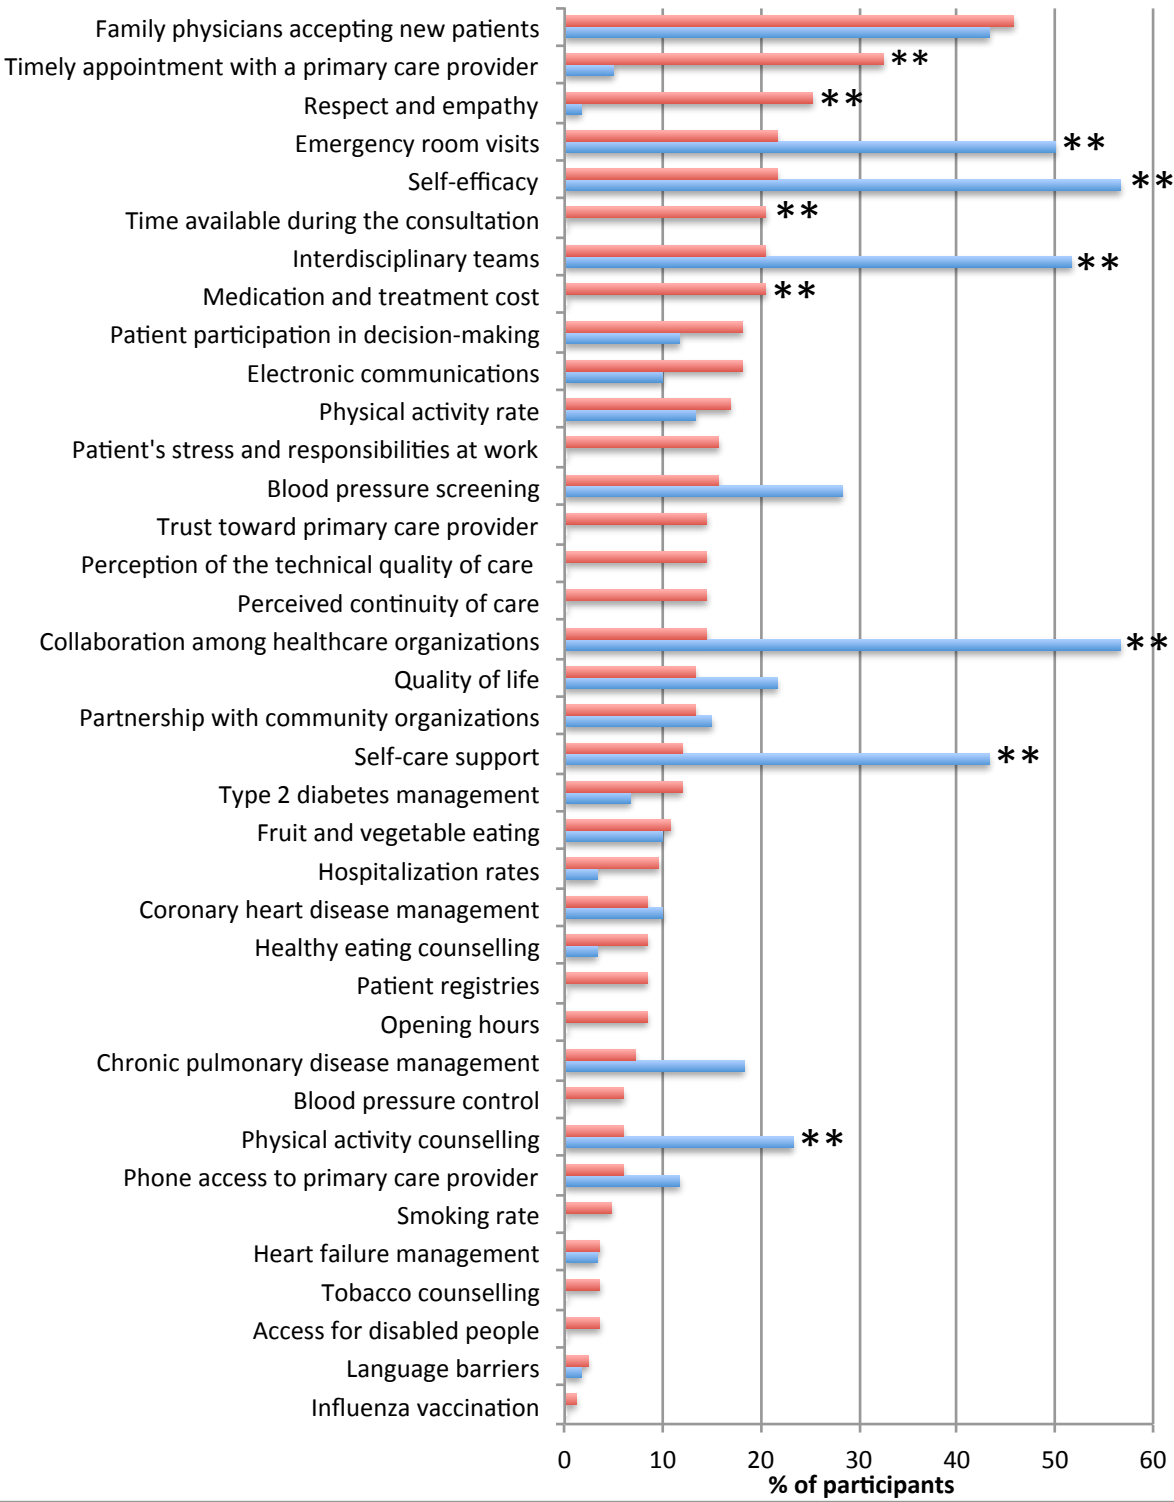

Supplement: MOESM3 [file 9630570]
